# Supplementary material
Source: PubMed Central journal article supplement (PMC5860231)
Supplement: kwx150greenleewebmaterialrevised.pdf [file kwx150greenleewebmaterialrevised.pdf]

**Web Table 1. Description of cancer and cardiovascular disease prevention metrics adapted from American Cancer Society and American Heart Association recommendations**

|                                                   | ACS recommendations                                        | AHA recommendations                                       |
|---------------------------------------------------|------------------------------------------------------------|-----------------------------------------------------------|
| <b>Alcohol consumption</b>                        |                                                            |                                                           |
| Poor (0)                                          | >2/day for men or >1/day for women                         | N/A                                                       |
| Intermediate (1)                                  | Moderate drinkers (<2/day men/<1/day women)                |                                                           |
| Ideal (2)                                         | Current non-drinkers                                       |                                                           |
| <b>Leisure-time Physical activity<sup>a</sup></b> |                                                            |                                                           |
| Poor (0)                                          | 0 MET-hr/wk                                                | 0 MET-hr/wk                                               |
| Intermediate (1)                                  | ≥ 0 - <8.75 MET-hr/wk                                      | ≥ 0 - <8.75 MET-hr/wk                                     |
| Ideal (2)                                         | ≥8.75 MET-hr/wk                                            | ≥8.75 MET-hr/wk                                           |
| <b>Healthy diet score</b>                         |                                                            |                                                           |
| Poor (0)                                          | ACS diet score < 3 <sup>b</sup>                            | Meeting 0-1 AHA diet components <sup>c</sup>              |
| Intermediate (1)                                  | ACS diet score 3-5                                         | Meeting 2-3 AHA diet components                           |
| Ideal (2)                                         | ACS diet score ≥ 6                                         | Meeting 4-5 AHA diet components                           |
| <b>Body weight</b>                                |                                                            |                                                           |
| Poor (0)                                          | BMI ≥ 30kg/m <sup>2</sup> either baseline, age 50, or both | BMI ≥ 30kg/m <sup>2</sup>                                 |
| Intermediate (1)                                  | Other combinations of weight status                        | 25 ≤ BMI < 30kg/m <sup>2</sup>                            |
| Ideal (2)                                         | BMI < 25kg/m <sup>2</sup> at baseline and age 50           | BMI < 25kg/m <sup>2</sup>                                 |
| <b>Smoking<sup>d</sup></b>                        |                                                            |                                                           |
| Poor (0)                                          | Current smoker                                             | Current smoker                                            |
| Intermediate (1)                                  | Quit ≤ 1 year ago                                          | Quit ≤ 1 year ago                                         |
| Ideal (2)                                         | Never smoker or quit > 1 year ago                          | Never smoker or quit > 1 year ago                         |
| <b>Blood pressure</b>                             |                                                            |                                                           |
| Poor (0)                                          | N/A                                                        | SBP ≥ 140 or DBP ≥ 90                                     |
| Intermediate (1)                                  |                                                            | SBP 120-139 or DBP 80-89 or treated to ideal <sup>e</sup> |
| Ideal (2)                                         |                                                            | SBP < 120 and DBP < 80                                    |
| <b>Total cholesterol</b>                          |                                                            |                                                           |
| Poor (0)                                          | N/A                                                        | ≥ 240mg/dL                                                |
| Intermediate (1)                                  |                                                            | 200-239mg/dL or treated to ideal level <sup>e</sup>       |
| Ideal (2)                                         |                                                            | < 200mg/dL                                                |
| <b>Fasting plasma glucose</b>                     |                                                            |                                                           |
| Poor (0)                                          | N/A                                                        | ≥ 126mg/dL                                                |
| Intermediate (1)                                  |                                                            | 100-125 mg/dL or treated to ideal level <sup>e</sup>      |
| Ideal (2)                                         |                                                            | < 100mg/dL                                                |

ACS, American Cancer Society; AHA, American Heart Association; BMI, body mass index; CHS, Cardiovascular Health Study; DBP, diastolic blood pressure; MET-hr, metabolic equivalent hour (kcal expended per kg body weight); SBP, systolic blood pressure.

<sup>a</sup> Under the AHA (1) and ACS, (2) minimum recommended physical activity considered as ideal health is ≥ 150 minutes/week moderate-intensity physical activity (3.5 METs), which translates to 8.75 MET-hr/week.

<sup>b</sup> We created an ACS diet sub-score ranging from 0-9. First, one point was given for consuming 2.5 or more cups of fruits and vegetables/day, excluding juice and potatoes. We then created a fruit and vegetable variety score by summing the number of unique fruits and vegetables consumed at least once per month. Two points and one point were assigned to those in the highest and middle tertiles of variety, respectively. For red and processed meats, quartiles of servings per day were assigned values from 0 (highest quartile) to 3 (lowest quartile). Proportion of whole grains was calculated by dividing servings/day of whole grains (dark bread, high fiber cereals, cooked cereals) by servings per day of refined grains (all other grain products on the questionnaire). Scores of 0-3 were assigned over quartiles of whole grain fraction.

<sup>c</sup> AHA diet components include limiting intake of sodium (< 1500mg/day) and sugar-sweetened beverages (< 36oz/week), while maintaining a diet rich in fruits and vegetables (≥ 4.5 cups/day), fish (≥ 2 – 3.5oz servings/week), and whole grains (≥ 3 – 1oz servings/day). Concordance with 4 out of these 5 criteria are recommended for ideal cardiovascular health.

<sup>d</sup> While ACS guidelines do not set targets for smoking behavior, we incorporated smoking status into the definition of concordance with ACS recommendations since this organization unequivocally supports smoking cessation.

<sup>e</sup> Individuals treated with drugs for dyslipidemia, hypertension and diabetes were not considered to have ideal risk factor status regardless of their achieved level of FPG, BP or TC. These individuals were assigned to either intermediate or poor risk factor status categories depending on whether or not treatment targets were achieved.

**Web Table 2. Concordance with ACS/AHA prevention guidelines and subsequent incidence of cancer and cardiovascular disease (n=3,491)**

| Prevention guideline concordance  | Cancer Incidence |                                   |                      | CVD Incidence |                                   |                      |
|-----------------------------------|------------------|-----------------------------------|----------------------|---------------|-----------------------------------|----------------------|
|                                   | Cases            | Adjusted HR (95% CI) <sup>a</sup> | P-trend <sup>a</sup> | Cases         | Adjusted HR (95% CI) <sup>a</sup> | P-trend <sup>a</sup> |
| <b>ACS metrics</b>                |                  |                                   |                      |               |                                   |                      |
| ACS Body weight = Poor (0)        | 152              | 1.00 (Referent)                   | 0.4137               | 430           | 1.00 (Referent)                   | <0.0001              |
| Intermediate (1)                  | 370              | 0.90 (0.75, 1.10)                 |                      | 973           | 0.89 (0.79, 1.00)                 |                      |
| Ideal (2)                         | 237              | 0.91 (0.73, 1.12)                 |                      | 575           | 0.73 (0.64, 0.83)                 |                      |
| Drinking = Poor (0)               | 97               | 1.00 (Referent)                   | 0.0099               | 207           | 1.00 (Referent)                   | 0.0640               |
| Intermediate (1)                  | 346              | 1.02 (0.81, 1.29)                 |                      | 766           | 1.02 (0.87, 1.19)                 |                      |
| Ideal (2)                         | 316              | 0.80 (0.63, 1.02)                 |                      | 1005          | 1.12 (0.96, 1.31)                 |                      |
| ACS Diet score = Poor (0)         | 120              | 1.00 (Referent)                   | 0.7997               | 292           | 1.00 (Referent)                   | 0.2070               |
| Intermediate (1)                  | 483              | 1.01 (0.82, 1.23)                 |                      | 1250          | 0.94 (0.82, 1.07)                 |                      |
| Ideal (2)                         | 156              | 0.97 (0.76, 1.25)                 |                      | 436           | 0.90 (0.77, 1.05)                 |                      |
| <b>Shared metrics<sup>b</sup></b> |                  |                                   |                      |               |                                   |                      |
| Smoking = Poor (0)                | 125              | 1.00 (Referent)                   | <.0001               | 235           | 1.00 (Referent)                   | 0.0206               |
| Intermediate (1)                  | 20               | 1.40 (0.87, 2.25)                 |                      | 27            | 0.75 (0.50, 1.12)                 |                      |
| Ideal (2)                         | 614              | 0.64 (0.52, 0.78)                 |                      | 1716          | 0.84 (0.73, 0.97)                 |                      |
| PA = Poor (0)                     | 55               | 1.00 (Referent)                   | 0.0627               | 164           | 1.00 (Referent)                   | 0.0002               |
| Intermediate (1)                  | 191              | 0.95 (0.70, 1.28)                 |                      | 497           | 0.88 (0.73, 1.05)                 |                      |
| Ideal (2)                         | 513              | 0.83 (0.62, 1.10)                 |                      | 1317          | 0.76 (0.65, 0.90)                 |                      |
| <b>AHA metrics</b>                |                  |                                   |                      |               |                                   |                      |
| AHA Diet score = Poor (0)         | 229              | 1.00 (Referent)                   | 0.0592               | 495           | 1.00 (Referent)                   | 0.5141               |
| Intermediate (1)                  | 477              | 0.86 (0.73, 1.01)                 |                      | 1340          | 1.13 (1.01, 1.25)                 |                      |
| Ideal (2)                         | 53               | 0.82 (0.60, 1.11)                 |                      | 143           | 0.94 (0.78, 1.14)                 |                      |
| AHA Body weight = Poor (0)        | 149              | 1.00 (Referent)                   | 0.3070               | 399           | 1.00 (Referent)                   | 0.0009               |
| Intermediate (1)                  | 326              | 0.85 (0.70, 1.03)                 |                      | 870           | 0.93 (0.83, 1.05)                 |                      |
| Ideal (2)                         | 284              | 0.87 (0.71, 1.07)                 |                      | 709           | 0.82 (0.72, 0.93)                 |                      |
| FPG = Poor (0)                    | 87               | 1.00 (Referent)                   | 0.6150               | 301           | 1.00 (Referent)                   | <0.0001              |
| Intermediate (1)                  | 342              | 1.08 (0.85, 1.38)                 |                      | 831           | 0.62 (0.55, 0.71)                 |                      |
| Ideal (2)                         | 330              | 1.00 (0.78, 1.27)                 |                      | 846           | 0.55 (0.48, 0.64)                 |                      |
| BP = Poor (0)                     | 294              | 1.00 (Referent)                   | 0.6825               | 912           | 1.00 (Referent)                   | <0.0001              |
| Intermediate (1)                  | 335              | 0.99 (0.85, 1.16)                 |                      | 806           | 0.72 (0.65, 0.79)                 |                      |
| Ideal (2)                         | 130              | 0.95 (0.77, 1.18)                 |                      | 260           | 0.54 (0.47, 0.62)                 |                      |
| TC = Poor (0)                     | 145              | 1.00 (Referent)                   | 0.4291               | 439           | 1.00 (Referent)                   | 0.4713               |
| Intermediate (1)                  | 306              | 1.11 (0.91, 1.35)                 |                      | 778           | 0.93 (0.83, 1.05)                 |                      |
| Ideal (2)                         | 308              | 1.10 (0.90, 1.35)                 |                      | 761           | 0.95 (0.84, 1.07)                 |                      |

ACS, American Cancer Society; AHA, American Heart Association; BP, blood pressure; CI, confidence interval; CVD, cardiovascular disease; FPG, fasting plasma glucose; HR, hazard ratio; PA, physical activity; TC, serum total cholesterol

<sup>a</sup> Adjusted for age (continuous), self-rated health (continuous), detailed smoking history (except models of smoking main effect), race/ethnicity, income, education, gender, and marital status; models of CVD incidence were additionally adjusted for nonsteroidal antiinflammatory drug use and limitations in instrumental activities of daily living

<sup>b</sup> Scores for smoking and physical activity were computed using identical criteria for both AHA and ACS guidelines

**Web Table 3. Concordance with ACS/AHA individual prevention metrics and subsequent cause-specific and overall mortality (n=3,491)**

| Prevention guideline concordance  | Cancer Mortality |                                   |                      | CV-Specific Mortality |                                   |                      | All-Cause Mortality |                                   |                      |
|-----------------------------------|------------------|-----------------------------------|----------------------|-----------------------|-----------------------------------|----------------------|---------------------|-----------------------------------|----------------------|
|                                   | Cases            | Adjusted HR (95% CI) <sup>a</sup> | P-trend <sup>a</sup> | Cases                 | Adjusted HR (95% CI) <sup>a</sup> | P-trend <sup>a</sup> | Cases               | Adjusted HR (95% CI) <sup>a</sup> | P-trend <sup>a</sup> |
| <b>ACS metrics</b>                |                  |                                   |                      |                       |                                   |                      |                     |                                   |                      |
| Body weight = Poor (0)            | 115              | 1.00 (Referent)                   | 0.1662               | 219                   | 1.00 (Referent)                   | 0.0009               | 543                 | 1.00 (Referent)                   | 0.0856               |
| Intermediate (1)                  | 291              | 0.94 (0.76, 1.18)                 |                      | 440                   | 0.77 (0.65, 0.91)                 |                      | 1278                | 0.89 (0.80, 0.99)                 |                      |
| Ideal (2)                         | 174              | 0.85 (0.67, 1.08)                 |                      | 275                   | 0.72 (0.60, 0.87)                 |                      | 869                 | 0.89 (0.80, 1.00)                 |                      |
| Drinking = Poor (0)               | 72               | 1.00 (Referent)                   | 0.3421               | 84                    | 1.00 (Referent)                   | 0.0107               | 286                 | 1.00 (Referent)                   | 0.1073               |
| Intermediate (1)                  | 254              | 1.03 (0.79, 1.34)                 |                      | 350                   | 1.09 (0.86, 1.39)                 |                      | 1056                | 1.00 (0.88, 1.14)                 |                      |
| Ideal (2)                         | 254              | 0.92 (0.70, 1.21)                 |                      | 500                   | 1.28 (1.01, 1.63)                 |                      | 1348                | 1.08 (0.94, 1.23)                 |                      |
| Diet score = Poor (0)             | 106              | 1.00 (Referent)                   | 0.0254               | 142                   | 1.00 (Referent)                   | 0.1048               | 431                 | 1.00 (Referent)                   | <0.0001              |
| Intermediate (1)                  | 362              | 0.81 (0.65, 1.02)                 |                      | 603                   | 0.96 (0.80, 1.15)                 |                      | 1716                | 0.87 (0.78, 0.97)                 |                      |
| Ideal (2)                         | 112              | 0.72 (0.54, 0.96)                 |                      | 189                   | 0.84 (0.67, 1.05)                 |                      | 543                 | 0.75 (0.66, 0.86)                 |                      |
| <b>Shared metrics<sup>b</sup></b> |                  |                                   |                      |                       |                                   |                      |                     |                                   |                      |
| Smoking = Poor (0)                | 113              | 1.00 (Referent)                   | <0.0001              | 121                   | 1.00 (Referent)                   | <0.0001              | 377                 | 1.00 (Referent)                   | <0.0001              |
| Intermediate (1)                  | 15               | 0.99 (0.58, 1.70)                 |                      | 15                    | 0.86 (0.50, 1.47)                 |                      | 42                  | 0.76 (0.55, 1.04)                 |                      |
| Ideal (2)                         | 452              | 0.46 (0.37, 0.57)                 |                      | 798                   | 0.64 (0.52, 0.77)                 |                      | 2271                | 0.57 (0.51, 0.64)                 |                      |
| PA = Poor (0)                     | 43               | 1.00 (Referent)                   | 0.0108               | 82                    | 1.00 (Referent)                   | 0.0244               | 221                 | 1.00 (Referent)                   | <0.0001              |
| Intermediate (1)                  | 154              | 0.95 (0.67, 1.33)                 |                      | 226                   | 0.83 (0.64, 1.07)                 |                      | 676                 | 0.91 (0.78, 1.06)                 |                      |
| Ideal (2)                         | 383              | 0.76 (0.55, 1.04)                 |                      | 626                   | 0.76 (0.60, 0.96)                 |                      | 1793                | 0.79 (0.68, 0.91)                 |                      |
| <b>AHA metrics</b>                |                  |                                   |                      |                       |                                   |                      |                     |                                   |                      |
| Diet score = Poor (0)             | 187              | 1.00 (Referent)                   | 0.1267               | 223                   | 1.00 (Referent)                   | 0.2473               | 713                 | 1.00 (Referent)                   | 0.9173               |
| Intermediate (1)                  | 342              | 0.78 (0.65, 0.93)                 |                      | 653                   | 1.26 (1.08, 1.48)                 |                      | 1782                | 1.05 (0.96, 1.15)                 |                      |
| Ideal (2)                         | 51               | 0.97 (0.71, 1.33)                 |                      | 58                    | 0.92 (0.68, 1.23)                 |                      | 195                 | 0.92 (0.78, 1.08)                 |                      |
| Body weight = Poor (0)            | 114              | 1.00 (Referent)                   | 0.2250               | 188                   | 1.00 (Referent)                   | 0.2559               | 500                 | 1.00 (Referent)                   | 0.6588               |
| Intermediate (1)                  | 255              | 0.90 (0.72, 1.13)                 |                      | 397                   | 0.87 (0.73, 1.04)                 |                      | 1121                | 0.92 (0.82, 1.02)                 |                      |
| Ideal (2)                         | 211              | 0.86 (0.68, 1.09)                 |                      | 349                   | 0.88 (0.73, 1.06)                 |                      | 1069                | 0.99 (0.89, 1.11)                 |                      |
| FPG = Poor (0)                    | 70               | 1.00 (Referent)                   | 0.2918               | 167                   | 1.00 (Referent)                   | <0.0001              | 382                 | 1.00 (Referent)                   | <0.0001              |
| Intermediate (1)                  | 253              | 0.88 (0.67, 1.15)                 |                      | 373                   | 0.51 (0.42, 0.61)                 |                      | 1095                | 0.64 (0.56, 0.72)                 |                      |
| Ideal (2)                         | 257              | 0.85 (0.65, 1.11)                 |                      | 394                   | 0.51 (0.42, 0.61)                 |                      | 1213                | 0.66 (0.58, 0.74)                 |                      |
| BP = Poor (0)                     | 225              | 1.00 (Referent)                   | 0.6280               | 475                   | 1.00 (Referent)                   | <0.0001              | 1175                | 1.00 (Referent)                   | <0.0001              |
| Intermediate (1)                  | 245              | 0.91 (0.75, 1.09)                 |                      | 354                   | 0.67 (0.58, 0.77)                 |                      | 1120                | 0.84 (0.77, 0.91)                 |                      |
| Ideal (2)                         | 110              | 0.97 (0.77, 1.23)                 |                      | 105                   | 0.49 (0.40, 0.61)                 |                      | 395                 | 0.72 (0.64, 0.81)                 |                      |
| TC= Poor (0)                      | 122              | 1.00 (Referent)                   | 0.7717               | 185                   | 1.00 (Referent)                   | 0.0364               | 571                 | 1.00 (Referent)                   | 0.0271               |
| Intermediate (1)                  | 226              | 0.98 (0.78, 1.22)                 |                      | 364                   | 1.08 (0.90, 1.29)                 |                      | 1035                | 1.00 (0.90, 1.10)                 |                      |
| Ideal (2)                         | 232              | 1.03 (0.81, 1.29)                 |                      | 385                   | 1.21 (1.00, 1.45)                 |                      | 1084                | 1.11 (1.00, 1.24)                 |                      |

Abbreviations: ACS, American Cancer Society; AHA, American Heart Association; BP, blood pressure; CI, confidence interval; CV, cardiovascular; FPG, fasting plasma glucose; HR, hazard ratio; PA, physical activity; TC, serum total cholesterol

<sup>a</sup> Adjusted for age (continuous), self-rated health (continuous), detailed smoking history (except models of smoking main effect), race/ethnicity, income, education, gender, and marital status; models of CV-specific and all-cause mortality were additionally adjusted for nonsteroidal antiinflammatory drug use and limitations in instrumental activities of daily living

<sup>b</sup> Scores for smoking and physical activity were computed using identical criteria for both AHA and ACS guidelines

**Web Table 4. Numbers of CHS participants achieving different levels of modified ACS health behavior, by number of ideal cardiometabolic risk factors in the AHA guidelines (n=3,491)**

|                                                                  | <b>Number of AHA cardiometabolic risk factor targets met (FPG, BMI, BP, TC)</b> |          |          |            |
|------------------------------------------------------------------|---------------------------------------------------------------------------------|----------|----------|------------|
|                                                                  | <b>0</b>                                                                        | <b>1</b> | <b>2</b> | <b>3-4</b> |
| Concordance with ACS health behavior guidelines                  | n                                                                               | n        | n        | n          |
| <b>ACS behaviors sum (without smoking included) <sup>a</sup></b> |                                                                                 |          |          |            |
| 0-4                                                              | 72                                                                              | 100      | 62       | 38         |
| 5-6                                                              | 437                                                                             | 675      | 547      | 286        |
| 7-8                                                              | 247                                                                             | 441      | 364      | 222        |
| <b>ACS behaviors sum (with smoking included) <sup>b</sup></b>    |                                                                                 |          |          |            |
| 0-4                                                              | 120                                                                             | 182      | 162      | 104        |
| 5-6                                                              | 409                                                                             | 630      | 483      | 244        |
| 7-8                                                              | 227                                                                             | 404      | 328      | 198        |

ACS, American Cancer Society; AHA, American Heart Association; BMI, body mass index; BP, blood pressure; CHS, Cardiovascular Health Study; FPG, fasting plasma glucose; TC, total cholesterol

<sup>a</sup> ACS behaviors score is the sum of ACS sub-scores for alcohol consumption, physical activity, and diet

<sup>b</sup> Smoking added to behaviors score in sensitivity analyses

**Web Table 5. ACS health behaviors score modified to include smoking as predictor of all-cause mortality and incident CVD, by number of ideal cardiometabolic risk factors (n=3,491)**

| Concordance with ACS health behavior guidelines | No. of AHA cardiometabolic risk factor targets met (FPG, BMI, BP, TC) |                            |                            |                              | P-for-interaction | Overall HR (95% CI) <sup>b</sup> |
|-------------------------------------------------|-----------------------------------------------------------------------|----------------------------|----------------------------|------------------------------|-------------------|----------------------------------|
|                                                 | 0 HR (95% CI) <sup>b</sup>                                            | 1 HR (95% CI) <sup>b</sup> | 2 HR (95% CI) <sup>b</sup> | 3-4 HR (95% CI) <sup>b</sup> |                   |                                  |
| <b>All-cause mortality</b>                      |                                                                       |                            |                            |                              | 0.27              |                                  |
| <b>ACS behaviors sum<sup>a</sup></b>            |                                                                       |                            |                            |                              |                   |                                  |
| 0-4                                             | 1.56 (1.21, 2.02)                                                     | 1.49 (1.19, 1.88)          | 1.61 (1.27, 2.04)          | 2.05 (1.58, 2.67)            |                   | 1.46 (1.31, 1.62)                |
| 5-6                                             | 1.03 (0.84, 1.26)                                                     | 1.06 (0.88, 1.28)          | 1.26 (1.04, 1.52)          | 1.14 (0.91, 1.41)            |                   | 1.18 (1.08, 1.28)                |
| 7-8                                             | 1.06 (0.85, 1.33)                                                     | 0.87 (0.71, 1.07)          | 0.95 (0.77, 1.17)          | 1                            |                   | 1                                |
| P-continuous <sup>c</sup>                       | <0.0001                                                               | <0.0001                    | <0.0001                    | <0.0001                      |                   | <0.0001                          |
| <b>Incident CVD</b>                             |                                                                       |                            |                            |                              | 0.34              |                                  |
| <b>ACS behaviors sum<sup>a</sup></b>            |                                                                       |                            |                            |                              |                   |                                  |
| 0-4                                             | 1.75 (1.30, 2.36)                                                     | 1.37 (1.04, 1.80)          | 1.15 (0.86, 1.55)          | 1.33 (0.95, 1.86)            |                   | 1.28 (1.12, 1.47)                |
| 5-6                                             | 1.27 (1.00, 1.60)                                                     | 1.16 (0.93, 1.45)          | 1.10 (0.87, 1.38)          | 0.90 (0.68, 1.17)            |                   | 1.05 (0.95, 1.16)                |
| 7-8                                             | 1.14 (0.87, 1.47)                                                     | 1.15 (0.91, 1.45)          | 0.97 (0.76, 1.24)          | 1                            |                   | 1                                |
| P-continuous <sup>c</sup>                       | <0.001                                                                | 0.004                      | <0.001                     | 0.005                        |                   | 0.0002                           |

ACS, American Cancer Society; AHA, American Heart Association; BMI, body mass index; BP, blood pressure; CHS, Cardiovascular Health Study; FPG, fasting plasma glucose; TC, total cholesterol

<sup>a</sup> ACS behaviors sum is the sum of ACS sub-scores for alcohol consumption, physical activity, smoking, and diet

<sup>b</sup> Hazard ratios derived from Cox proportional hazards models with predictors for ACS behaviors sum, the number of AHA cardiometabolic risk factor targets met, and the interaction between them, while adjusting for age, self-rated health, race/ethnicity, income, education, gender, marital status, limitations in instrumental activities of daily living, and use of non-steroidal anti-inflammatory drugs, antihypertensive drugs, oral hypoglycemic agents, insulin, and lipid-lowering drugs.

<sup>c</sup> P-values for ACS behaviors sum effect estimates within strata of number of AHA cardiometabolic risk factor targets met were derived from interaction models in which the ACS behaviors sum was treated as a continuous measure.

## Web References

1. Lloyd-Jones DM, Hong Y, Labarthe D, et al. Defining and setting national goals for cardiovascular health promotion and disease reduction: The American Heart Association's strategic impact goal through 2020 and beyond. *Circulation*. 2010;121(4):586–613.
2. Kushi LH, Doyle C, McCullough M, et al. American Cancer Society Guidelines on Nutrition and Physical Activity for Cancer Prevention Reducing the Risk of Cancer With Healthy Food Choices and Physical Activity. *CA. Cancer J. Clin.* 2012;62(1):30–67.
